# Supplementary material for: Human Mesenchymal Stromal Cells Do Not Cause Radioprotection of Head-and-Neck Squamous Cell Carcinoma
Source: MDPI journal article supplement (doi:10.3390/ijms23147689), 2022-07-12
Supplement: s1 [file s1]

**Supplementary Table S1.** Sensitizer Enhancement Ratio (SER) values calculated at 10% survival in the clonogenic survival assays. Radiation doses resulting in 10% survival were calculated based on the fitted survival curves according to the linear-quadratic model. SER values were computed with the formula: Radiation dose at 10% survival<sub>mono-culture</sub>/Radiation dose at 10% survival<sub>co-culture</sub>. No statistical analyses were performed regarding the SER values, as the different groups were compared with paired t-tests (for the entire curves) or ANOVA with post-hoc Dunnett's tests (for the 8 Gy dose).

|                | UD-SCC-5 | FaDu | Cal27 | UD-SCC-3 | Detroit562 | UD-SCC-2 |
|----------------|----------|------|-------|----------|------------|----------|
| <b>MSC1</b>    | 1.13     | 0.90 | 0.92  | 0.95     | 1.10       | 1.08     |
| <b>MSC2</b>    | 1.10     | 0.93 | 0.89  | 0.88     | 1.10       | 1.09     |
| <b>MSC1-CM</b> | 1.28     | 0.97 | 0.85  | 1.06     | 1.30       | 1.19     |
| <b>MSC2-CM</b> | 1.17     | 0.94 | 0.95  | 1.00     | 1.19       | 1.21     |
